# Supplementary material for: Phylogenetic relationships in the southern African genus Drosanthemum (Ruschioideae, Aizoaceae)
Source: PubMed Central journal article supplement (PMC7213013; doi:10.7717/peerj.8999), 2020-05-08
Supplement: peerj-08-8999-s002.pdf [file peerj-08-8999-s002.pdf]

## Supplementary information S2

to: Phylogenetic relationships in the southern African genus *Drosanthemum* (Ruschioideae, Aizoaceae)

by Liede-Schumann, Grimm, Nürk, Potts, Meve & Hartmann

Examples of character re-coding used for intra-clade haplotype analyses:

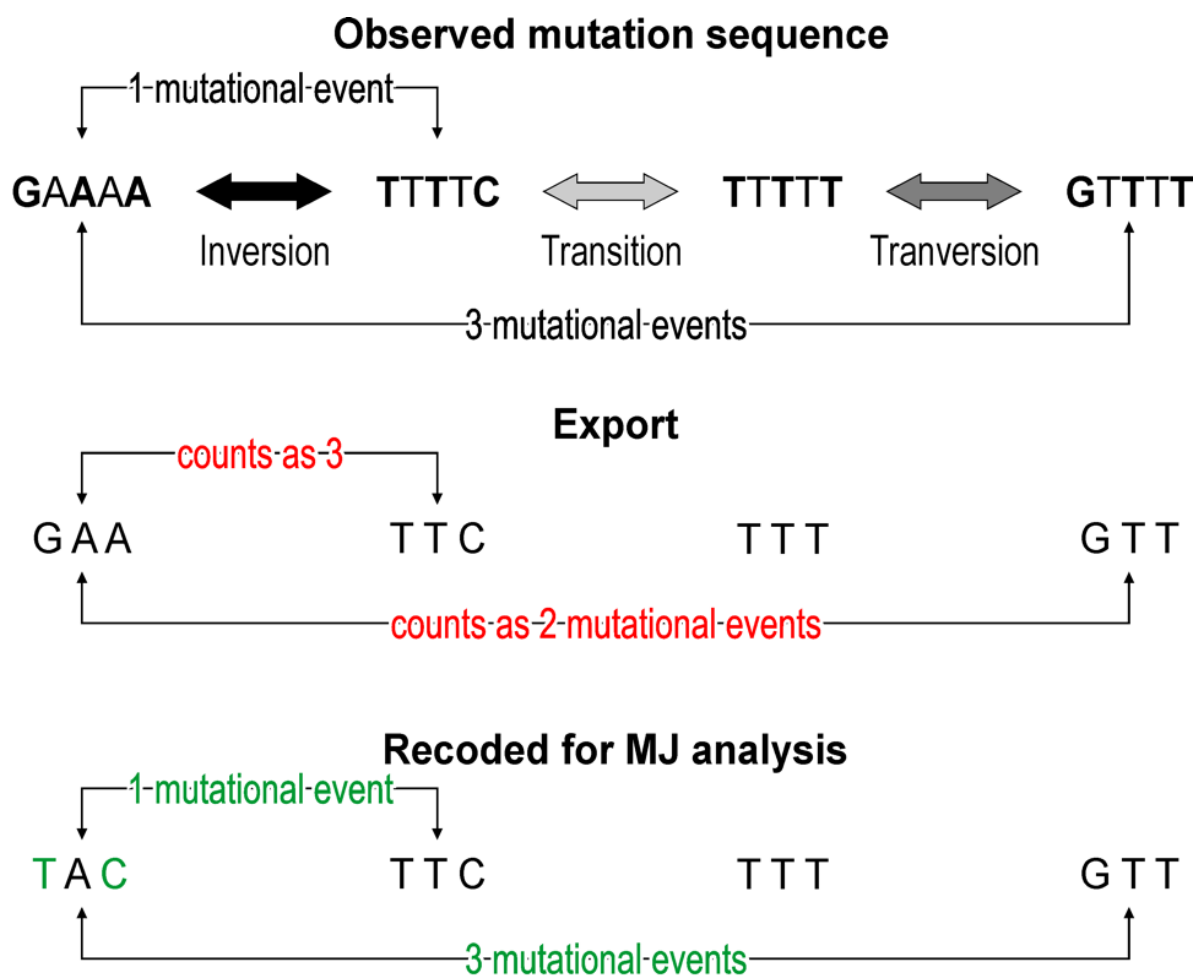

**Figure S2 (A): Examples of character re-coding.** Pseudo-loop motif (inversion with secondary point mutations), as found in the complementary ('pseudo-hairpin') region of the *trnK-rps16* in Clade III and IV (characters 7–9).

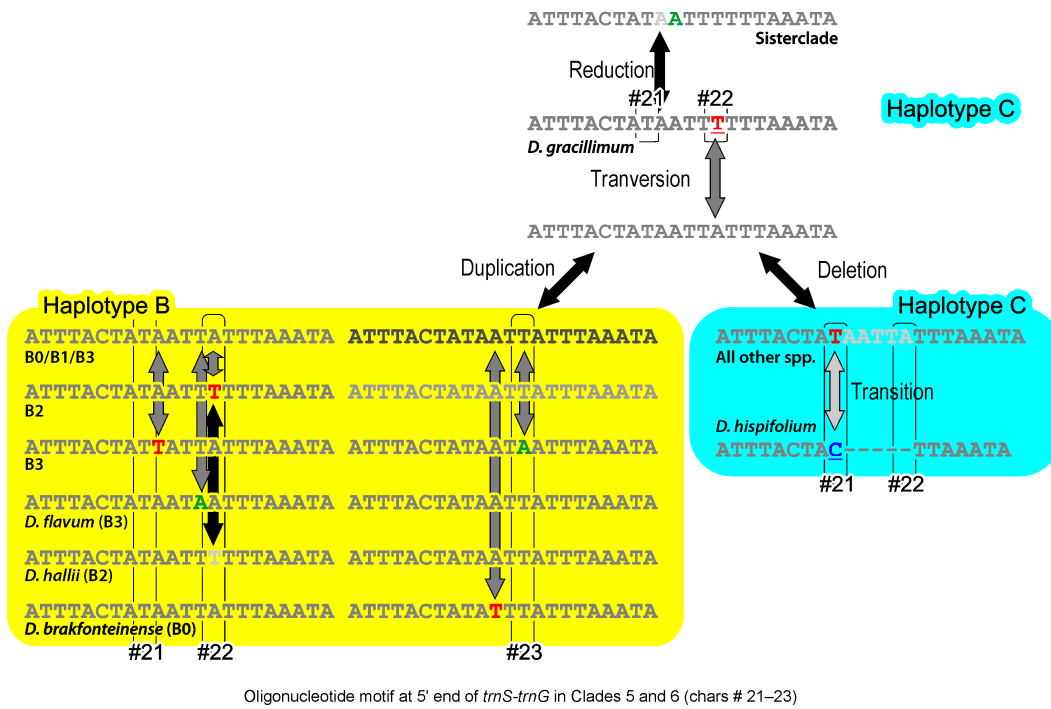

**Figure S2 (B): Examples of character re-coding.** Oligonucleotide motif at 5' end of *trnS-trnG* in Clades V and VI (characters 21–23).

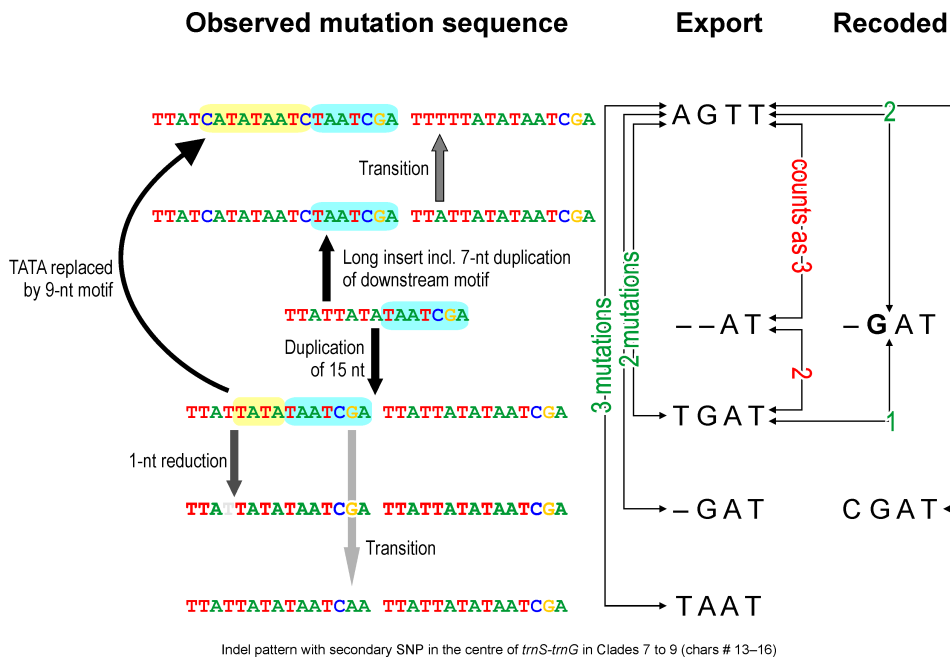

**Figure S2 (C): Examples of character re-coding.** Indel pattern with secondary SNP in the centre of *trnS-trnG* in Clades VII–IX (characters 13–16).
