# Supplementary material for: Phylogenetic relationships in the southern African genus Drosanthemum (Ruschioideae, Aizoaceae)
Source: PeerJ journal article supplement (doi:10.7717/peerj.8999), 2020-05-08
Supplement: Supplemental_Information_S1_Liede_Schumann_etal_Voucher_Table.pdf [file Supplemental_Information_S1_Liede_Schumann_etal_Voucher_Table.pdf]

## Supplementary information S1

to: Phylogenetic relationships in the southern African genus *Drosanthemum* (Ruschioideae, Aizoaceae)

by Liede-Schumann, Grimm, Nürk, Potts, Meve & Hartmann

**Table S1: Voucher.** Sequences newly produced for the present study are indicated in **bold**.

| Species                                                       | Section             | Voucher                              | Origin                                          | ITS             | rps16-trnK      | trnQ-rps16      | rpl16           | trnS-G          |
|---------------------------------------------------------------|---------------------|--------------------------------------|-------------------------------------------------|-----------------|-----------------|-----------------|-----------------|-----------------|
| <i>Drosanthemum acuminatum</i><br>L.Bolus                     | <i>Necopina</i>     | Hartmann & Bayer<br>34608 (HBG)      | South Africa:<br>Western Cape-<br>Montagu       | HG324008        | HG323956        | HG323982        | <b>LR030593</b> | <b>LR030877</b> |
| <i>Drosanthemum acutifolium</i><br>(L.Bolus) L.Bolus          | <i>Drosanthemum</i> | Bruckmann &<br>Hansen 32406<br>(HBG) | South Africa:<br>Western Cape-<br>Riversdale    | <b>LR030506</b> | <b>LR030685</b> | <b>LR030783</b> | <b>LR030594</b> | <b>LR030878</b> |
| <i>Drosanthemum</i><br><i>albiflorum</i> (L.Bolus) Schwantes  | <i>Vespertina</i>   | Bruckmann &<br>Hansen 32383<br>(HBG) | South<br>Africa: Western<br>Cape-Oudtshoorn     | ---             | <b>LR030686</b> | <b>LR030784</b> | <b>LR030595</b> | <b>LR030879</b> |
| <i>Drosanthemum ambiguum</i><br>L.Bolus                       | <i>Drosanthemum</i> | Hartmann 30388<br>(HBG)              | South Africa:<br>Western Cape-<br>Bredasdorp    | ---             | <b>LR030687</b> | <b>LR030785</b> | <b>LR030596</b> | <b>LR030880</b> |
| <i>Drosanthemum anemophilum</i><br>Van Jaarsveld & S.A.Hammer | <i>Decidua</i>      | VanJaarsveld sn                      | South Africa:<br>Western Cape-<br>Laingsburg    | LR030981        | LR031140        | LR031092        | LR031041        | LR031198        |
| <i>Drosanthemum archeri</i> L.Bolus                           | <i>Drosanthemum</i> | Hartmann et al.<br>31774 (HBG)       | South Africa:<br>Northern Cape-<br>Fraserburg   | <b>LR030507</b> | <b>LR030688</b> | <b>LR030786</b> | <b>LR030597</b> | <b>LR030881</b> |
| <i>Drosanthemum archeri</i> L.Bolus                           | <i>Drosanthemum</i> | Hartmann et al.<br>31788 (HBG)       | South Africa:<br>Western Cape-<br>Prince Albert | <b>LR030508</b> | <b>LR030689</b> | <b>LR030787</b> | <b>LR030598</b> | <b>LR030882</b> |
| <i>Drosanthemum asperulum</i><br>(Salm-Dyck) Schwantes        | <i>Quadrata</i>     | Bruyys 9005 (BOL)                    | South Africa:<br>Western Cape-<br>Montagu       | ---             | ---             | KF131854        | KF132147        | KF133114        |

| Species                                                                                  | Section             | Voucher                              | Origin                                         | ITS             | rps16-trnK      | trnQ-rps16      | rpl16           | trnS-G          |
|------------------------------------------------------------------------------------------|---------------------|--------------------------------------|------------------------------------------------|-----------------|-----------------|-----------------|-----------------|-----------------|
| <i>Drosanthemum asperulum</i><br>(Salm-Dyck) Schwantes                                   | <i>Quadrata</i>     | Hartmann & Bayer<br>34502 (HBG)      | South Africa:<br>Western Cape-<br>Swellendam   | LR030982        | LR031141        | LR031093        | LR031042        | LR031199        |
| <i>Drosanthemum attenuatum</i><br>(Haw.) Schwantes                                       | <i>Ossicula</i>     | Hartmann & Liede<br>11826 (HBG)      | South Africa:<br>Western Cape-<br>Simonstown   | LR030983        | LR031142        | LR031094        | LR031043        | LR031200        |
| <i>Drosanthemum attenuatum</i><br>(Haw.) Schwantes <i>aff.</i>                           | <i>Ossicula</i>     | Hartmann & Court<br>34650 (HBG)      | South Africa:<br>Western Cape-<br>Mosselbay    | <b>LR030509</b> | <b>LR030690</b> | <b>LR030788</b> | <b>LR030599</b> | <b>LR030883</b> |
| <i>Drosanthemum austricola</i><br>L.Bolus                                                | <i>Ossicula</i>     | Hartmann & Bayer<br>34695 (HBG)      | South Africa:<br>Western Cape-<br>Bredasdorp   | <b>LR030510</b> | <b>LR030691</b> | <b>LR030789</b> | <b>LR030600</b> | <b>LR030884</b> |
| <i>Drosanthemum bicolor</i> L.Bolus                                                      | <i>Necopina</i>     | Bruckmann &<br>Hansen 32459<br>(HBG) | South Africa<br>Western Cape-<br>Worcester     | <b>LR030511</b> | <b>LR030692</b> | <b>LR030790</b> | <b>LR030601</b> | <b>LR030885</b> |
| <i>Drosanthemum boerhavii</i><br>(Ecklon) H.E.K.Hartmann                                 | <i>Speciosa</i>     | Hartmann & Bayer<br>34697 (HBG)      | South Africa:<br>Western Cape-<br>Swellendam   | <b>LR030512</b> | <b>LR030693</b> | <b>LR030791</b> | <b>LR030602</b> | <b>LR030886</b> |
| <i>Drosanthemum boerhavii</i><br>(Ecklon)<br>H.E.K.Hartmann ( <i>D. aureopurpureum</i> ) | <i>Speciosa</i>     | Hartmann & Bayer<br>34478 (HBG)      | South Africa:<br>Western Cape-<br>Swellendam   | <b>LR030513</b> | <b>LR030694</b> | <b>LR030792</b> | ---             | ---             |
| <i>Drosanthemum boerhavii</i><br>(Ecklon) H.E.K.Hartmann ( <i>D. insolitum</i> )         | <i>Speciosa</i>     | Hartmann & Bayer<br>34596 (HBG)      | South Africa:<br>Western Cape-<br>Worcester    | LR030984        | LR031143        | LR031095        | LR031044        | LR031201        |
| <i>Drosanthemum boerhavii</i> ( <i>D. strictifolium</i> L.Bolus)                         | <i>Speciosa</i>     | Hartmann & Bayer<br>34480 (HBG)      | South Africa:<br>Western Cape-<br>Heidelberg   | <b>LR030514</b> | <b>LR030695</b> | <b>LR030793</b> | <b>LR030603</b> | <b>LR030887</b> |
| <i>Drosanthemum brakfonteinense</i> Liede,<br>A.Schweiger & H.E.K.Hartmann               | <i>Speciosa</i>     | Hartmann 34688<br>(HBG)              | South Africa:<br>Western Cape-<br>Swellendam   | <b>LR030515</b> | <b>LR030696</b> | <b>LR030794</b> | <b>LR030604</b> | <b>LR030888</b> |
| <i>Drosanthemum brevifolium</i><br>(Aiton) Schwantes                                     | <i>Drosanthemum</i> | Bruckmann &<br>Hansen 32242<br>(HBG) | South Africa:<br>Western Cape-<br>Vanrhynsdorp | <b>LR030516</b> | <b>LR030697</b> | <b>LR030795</b> | <b>LR030605</b> | <b>LR030889</b> |

| Species                                           | Section             | Voucher                                | Origin                                         | ITS             | rps16-trnK      | trnQ-rps16      | rpl16           | trnS-G          |
|---------------------------------------------------|---------------------|----------------------------------------|------------------------------------------------|-----------------|-----------------|-----------------|-----------------|-----------------|
| <i>Drosanthemum calycinum</i><br>(Haw.) Schwantes | <i>Quastea</i>      | Bruckmann &<br>Hansen 32211<br>(HBG)   | South Africa:<br>Western Cape-<br>Malmesbury   | HG324009        | HG323957        | HG323983        | ---             | <b>LR030890</b> |
| <i>Drosanthemum candens</i><br>(Haw.) Schwantes   | <i>Drosanthemum</i> | Hartmann & Dehn<br>25014 (HBG)         | South Africa:<br>Eastern Cape-<br>Albany       | LR030985        | LR031144        | LR031096        | LR031045        | LR031202        |
| <i>Drosanthemum candens</i><br>(Haw.) Schwantes   | <i>Drosanthemum</i> | Hartmann 30541<br>(HBG)                | South Africa:<br>Western Cape-<br>Murraysburg  | <b>LR030517</b> | <b>LR030698</b> | <b>LR030796</b> | <b>LR030606</b> | <b>LR030891</b> |
| <i>Drosanthemum candens</i><br>(Haw.) Schwantes   | <i>Drosanthemum</i> | Hartmann et al.<br>31897 (HBG)         | South Africa:<br>Eastern Cape-<br>Albany       | <b>LR030518</b> | <b>LR030699</b> | <b>LR030797</b> | <b>LR030607</b> | <b>LR030892</b> |
| <i>Drosanthemum cereale</i> L.Bolus               | <i>Speciosa</i>     | Hartmann & Bayer<br>34490 (HBG)        | South Africa:<br>Western Cape-<br>Caledon      | ---             | <b>LR030700</b> | <b>LR030798</b> | ---             | ---             |
| <i>Drosanthemum cereale</i> L.Bolus               | <i>Speciosa</i>     | Hartmann & Bayer<br>34491 (HBG)        | South Africa:<br>Western Cape-<br>Caledon      | <b>LR030519</b> | <b>LR030701</b> | ---             | ---             | <b>LR030893</b> |
| <i>Drosanthemum cereale</i> L.Bolus               | <i>Speciosa</i>     | Hartmann & Bayer<br>34492 (HBG)        | South Africa:<br>Western Cape-<br>Caledon      | <b>LR030520</b> | <b>LR030702</b> | <b>LR030799</b> | <b>LR030608</b> | <b>LR030894</b> |
| <i>Drosanthemum chrysum</i><br>L.Bolus            | <i>Speciosa</i>     | Hartmann & Bayer<br>34631 (HBG)        | South Africa:<br>Western Cape-<br>Caledon      | HG324010        | HG323958        | HG323984        | <b>LR030609</b> | <b>LR030895</b> |
| <i>Drosanthemum crassum</i><br>L.Bolus            | <i>Vespertina</i>   | Hartmann et al.<br>25896 (HBG)         | South Africa:<br>Western Cape-<br>Swellendam   | HG324011        | HG323959        | HG323985        | <b>LR030610</b> | <b>LR030896</b> |
| <i>Drosanthemum curtophyllum</i><br>L.Bolus       | <i>Xamera</i>       | Hartmann &<br>Potgieter 32673<br>(HBG) | South Africa:<br>Northern Cape-<br>Namaqualand | HG324012        | HG323960        | HG323986        | <b>LR030611</b> | <b>LR030897</b> |
| <i>Drosanthemum cymiferum</i><br>L.Bolus          | <i>Quastea</i>      | Hartmann et al.<br>25811 (HBG)         | South Africa:<br>Northern Cape-<br>Calvinia    | <b>LR030521</b> | <b>LR030703</b> | <b>LR030800</b> | ---             | <b>LR030898</b> |

| Species                                                                 | Section             | Voucher                              | Origin                                          | ITS      | rps16-trnK | trnQ-rps16 | rpl16    | trnS-G   |
|-------------------------------------------------------------------------|---------------------|--------------------------------------|-------------------------------------------------|----------|------------|------------|----------|----------|
| <i>Drosanthemum cymiferum</i><br>L.Bolus                                | <i>Quastea</i>      | Hartmann et al.<br>31686 (HBG)       | South Africa:<br>Northern Cape-<br>Calvinia     | LR030522 | LR030704   | LR030801   | LR030612 | LR030899 |
| <i>Drosanthemum cymiferum</i><br>L.Bolus                                | <i>Quastea</i>      | Bruckmann &<br>Hansen 32250<br>(HBG) | South Africa:<br>Northern Cape-<br>Calvinia     | LR030523 | LR030705   | LR030802   | ---      | LR030900 |
| <i>Drosanthemum deciduum</i><br>H.E.K.Hartmann & Bruckmann              | <i>Decidua</i>      | Bruckmann &<br>Hansen 32241<br>(HBG) | South Africa:<br>Western Cape-<br>Vanrhynsdorp  | ---      | LR030706   | LR030803   | LR030613 | LR030901 |
| <i>Drosanthemum deciduum</i><br>H.E.K.Hartmann & Bruckmann              | <i>Decidua</i>      | Klak 1638 (BOL)                      | South Africa:<br>Western Cape-<br>Vanrhynsdorp  | ---      | ---        | KF131855   | KF132148 | KF133115 |
| <i>Drosanthemum dejagerae</i><br>L.Bolus                                | <i>Xamera</i>       | Hartmann et al.<br>31812 (HBG)       | South Africa:<br>Western Cape-<br>Prince Albert | LR030524 | LR030707   | LR030804   | LR030614 | LR030902 |
| <i>Drosanthemum delicatulum</i><br>(L.Bolus) Schwantes                  | <i>Drosanthemum</i> | Hartmann 30782<br>(HBG)              | South Africa:<br>Western Cape-<br>Swellendam    | ---      | LR030708   | LR030805   | LR030615 | LR030903 |
| <i>Drosanthemum delicatulum</i><br>(L.Bolus) Schwantes                  | <i>Drosanthemum</i> | Bruckmann &<br>Hansen 32462<br>(HBG) | South Africa:<br>Western Cape-<br>Worcester     | LR030986 | LR031145   | LR031097   | LR031046 | LR031203 |
| <i>Drosanthemum dipageae</i><br>H.E.K.Hartmann                          | <i>Xamera</i>       | Hartmann 34409<br>(HBG)              | South Africa:<br>Eastern Cape-<br>Uitenhage     | LR030525 | LR030709   | LR030806   | LR030616 | LR030904 |
| <i>Drosanthemum ecclesianum</i><br>Liede & H.E.K.Hartmann               | <i>Necopina</i>     | Hartmann 34814<br>(HBG)              | South Africa:<br>Western Cape-<br>Uniondale     | LR030526 | LR030710   | LR030807   | LR030617 | LR030905 |
| <i>Drosanthemum sp.</i><br><i>ecclesianum</i> Liede &<br>H.E.K.Hartmann | <i>Necopina</i>     | Hartmann 34815<br>(HBG)              | South Africa:<br>Western Cape-<br>Uniondale     | LR030527 | LR030711   | LR030808   | LR030618 | ---      |
| <i>Drosanthemum edwardsiae</i><br>L.Bolus                               | <i>Speciosa</i>     | Hartmann & Court<br>34648 (HBG)      | South Africa:<br>Western Cape-<br>Mosselbay     | LR030528 | LR030712   | LR030809   | LR030619 | ---      |

| Species                                                 | Section             | Voucher                              | Origin                                          | ITS             | rps16-trnK      | trnQ-rps16      | rpl16           | trnS-G          |
|---------------------------------------------------------|---------------------|--------------------------------------|-------------------------------------------------|-----------------|-----------------|-----------------|-----------------|-----------------|
| <i>Drosanthemum edwardsiae</i><br>L.Bolus               | <i>Speciosa</i>     | Hartmann & Court<br>34651 (HBG)      | South Africa:<br>Western Cape-<br>Mosselbay     | HG324014        | HG323962        | HG323988        | LR031047        | ---             |
| <i>Drosanthemum erigeriflorum</i><br>(Jacq.) Stearn     | <i>Drosanthemum</i> | Hartmann & Dehn<br>26196 (HBG)       | South Africa:<br>Western Cape-<br>Heidelberg    | <b>LR030529</b> | <b>LR030713</b> | <b>LR030810</b> | <b>LR030620</b> | <b>LR030906</b> |
| <i>Drosanthemum expersum</i><br>(N.E.Br.) Schwantes     | <i>Quastea</i>      | Hartmann & Bayer<br>34590 (HBG)      | South Africa:<br>Western Cape-<br>Ceres         | <b>LR030530</b> | <b>LR030714</b> | <b>LR030811</b> | <b>LR030621</b> | <b>LR030907</b> |
| <i>Drosanthemum expersum</i><br>(N.E.Br.) Schwantes     | <i>Quastea</i>      | Hartmann & Bayer<br>34598 (HBG)      | South Africa:<br>Western Cape-<br>Montagu       | <b>LR030579</b> | <b>LR030766</b> | <b>LR030861</b> | <b>LR030667</b> | <b>LR030961</b> |
| <i>Drosanthemum flammeum</i><br>L.Bolus                 | <i>Speciosa</i>     | Hartmann & Bayer<br>34460 (HBG)      | South Africa:<br>Western Cape-<br>Worcester     | HG324015        | HG323963        | HG323989        | ---             | ---             |
| <i>Drosanthemum flavum</i> (Haw.)<br>Schwantes          | <i>Speciosa</i>     | Hartmann & Bayer<br>34706 (HBG)      | South Africa:<br>Western Cape-<br>Caledon       | <b>LR030531</b> | <b>LR030715</b> | <b>LR030812</b> | <b>LR030622</b> | <b>LR030908</b> |
| <i>Drosanthemum floribundum</i><br>(Haw.) Schwantes cf. | <i>Drosanthemum</i> | Hartmann 34403<br>(HBG)              | South Africa:<br>Eastern Cape-Port<br>Elizabeth | <b>LR030532</b> | <b>LR030716</b> | <b>LR030813</b> | <b>LR030623</b> | <b>LR030909</b> |
| <i>Drosanthemum fourcadei</i><br>Schwantes              | <i>Xamera</i>       | Hartmann 33900<br>(HBG)              | South Africa:<br>Eastern Cape-<br>Uitenhage     | <b>LR030533</b> | <b>LR030717</b> | <b>LR030814</b> | <b>LR030624</b> | <b>LR030910</b> |
| <i>Drosanthemum fourcadei</i><br>Schwantes              | <i>Xamera</i>       | Hartmann 34404<br>(HBG)              | South Africa:<br>Eastern Cape-Port<br>Elizabeth | <b>LR030552</b> | <b>LR030736</b> | <b>LR030832</b> | <b>LR030638</b> | <b>LR030929</b> |
| <i>Drosanthemum framesii</i><br>L.Bolus                 | <i>Drosanthemum</i> | Bruckmann &<br>Hansen 32339<br>(UBT) | South Africa:<br>Western Cape-<br>Ceres         | <b>LR030534</b> | <b>LR030718</b> | <b>LR030815</b> | <b>LR030625</b> | <b>LR030911</b> |
| <i>Drosanthemum glabrescens</i> L.<br>Bolus             | <i>Drosanthemum</i> | Bruckmann &<br>Hansen 32256<br>(UBT) | South Africa:<br>Northern Cape-<br>Calvinia     | <b>LR030535</b> | <b>LR030719</b> | <b>LR030816</b> | <b>LR030626</b> | <b>LR030912</b> |
| <i>Drosanthemum gracillimum</i><br>L.Bolus              | <i>Vespertina</i>   | Bruyns 7170 (BOL)                    | South Africa:<br>Western Cape-<br>Robertson     | ---             | ---             | KF131857        | ---             | KF133117        |

| Species                                             | Section             | Voucher                                | Origin                                                    | ITS             | rps16-trnK      | trnQ-rps16      | rpl16           | trnS-G          |
|-----------------------------------------------------|---------------------|----------------------------------------|-----------------------------------------------------------|-----------------|-----------------|-----------------|-----------------|-----------------|
| <i>Drosanthemum hallii</i> L.Bolus                  | <i>Speciosa</i>     | Hartmann & Bayer<br>34610 (HBG)        | South Africa:<br>Western Cape-<br>Worcester               | <b>LR030536</b> | <b>LR030720</b> | <b>LR030817</b> | ---             | <b>LR030913</b> |
| <i>Drosanthemum hispidum</i><br>(Haw.) Schwantes    | <i>Drosanthemum</i> | Hartmann 33866<br>(HBG)                | South Africa:<br>Eastern Cape-Port<br>Elizabeth           | HG324016        | HG323964        | HG323990        | LR031048        | LR031204        |
| <i>Drosanthemum hispidum</i><br>(Haw.) Schwantes    | <i>Drosanthemum</i> | Hartmann 34262<br>(HBG)                | South Africa:<br>Eastern Cape-Port<br>Elizabeth           | <b>LR030537</b> | <b>LR030721</b> | <b>LR030818</b> | <b>LR030627</b> | <b>LR030914</b> |
| <i>Drosanthemum hispifolium</i><br>(Haw.) Schwantes | <i>Ossicula</i>     | Bruckmann &<br>Hansen 32206<br>(HBG)   | South Africa:<br>Western Cape-<br>Malmesbury              | HG324017        | HG323965        | HG323991        | LR031049        | LR031205        |
| <i>Drosanthemum hispifolium</i><br>(Haw.) Schwantes | <i>Ossicula</i>     | Hartmann & Bayer<br>34587 (HBG)        | South Africa:<br>Western Cape-<br>Tulbagh                 | <b>LR030538</b> | <b>LR030722</b> | <b>LR030819</b> | <b>LR030628</b> | <b>LR030915</b> |
| <i>Drosanthemum inornatum</i><br>(L.Bolus) L.Bolus  | <i>Decidua</i>      | Bruyns 10066 (BOL)                     | Namibia: Rosh<br>Pinah                                    | ---             | ---             | KF131858        | KF132150        | KF133118        |
| <i>Drosanthemum inornatum</i><br>(L.Bolus) L.Bolus  | <i>Decidua</i>      | Hartmann &<br>Potgieter 32654<br>(HBG) | South Africa:<br>Northern Cape-<br>Namaqualand-<br>Numees | <b>LR030539</b> | <b>LR030723</b> | <b>LR030820</b> | ---             | <b>LR030916</b> |
| <i>Drosanthemum intermedium</i><br>L.Bolus          |                     | Bruckmann &<br>Hansen 32200<br>(HBG)   | South Africa:<br>Western Cape-<br>Simonstown              | LR030987        | LR031146        | LR031098        | LR031050        | LR031206        |
| <i>Drosanthemum intermedium</i><br>L.Bolus          |                     | Bruckmann &<br>Hansen 32439<br>(HBG)   | South Africa:<br>Western Cape-<br>Bredasdorp              | <b>LR030540</b> | <b>LR030724</b> | <b>LR030821</b> | <b>LR030629</b> | <b>LR030917</b> |
| <i>Drosanthemum latipetalum</i><br>L.Bolus          | <i>Drosanthemum</i> | Hartmann et al.<br>31568 (HBG)         | South Africa:<br>Northern Cape:<br>Namaqualand            | <b>LR030541</b> | <b>LR030725</b> | <b>LR030822</b> | <b>LR030630</b> | <b>LR030918</b> |
| <i>Drosanthemum latipetalum</i><br>L.Bolus          | <i>Drosanthemum</i> | Hartmann et al.<br>31605 (HBG)         | South Africa:<br>Northern Cape:<br>Namaqualand            | <b>LR030542</b> | <b>LR030726</b> | <b>LR030823</b> | <b>LR030631</b> | <b>LR030919</b> |

| Species                                                   | Section             | Voucher                              | Origin                                         | ITS             | rps16-trnK      | trnQ-rps16      | rpl16           | trnS-G          |
|-----------------------------------------------------------|---------------------|--------------------------------------|------------------------------------------------|-----------------|-----------------|-----------------|-----------------|-----------------|
| <i>Drosanthemum latipetalum</i><br>L.Bolus                | <i>Drosanthemum</i> | Bruckmann &<br>Hansen 32217<br>(HBG) | South Africa:<br>Western Cape-<br>Clanwilliam  | <b>LR030543</b> | <b>LR030727</b> | <b>LR030824</b> | <b>LR030632</b> | <b>LR030920</b> |
| <i>Drosanthemum lavisii</i> L.Bolus                       | <i>Speciosa</i>     | Hartmann & Bayer<br>34693 (HBG)      | South Africa:<br>Western Cape-<br>Napier       | <b>LR030544</b> | <b>LR030728</b> | <b>LR030825</b> | <b>LR030633</b> | <b>LR030921</b> |
| <i>Drosanthemum lique</i> (N.E.Br.)<br>Schwantes          | <i>Vespertina</i>   | Hartmann 34447<br>(HBG)              | South Africa:<br>Northern Cape-<br>Williston   | HG324018        | HG323966        | HG323992        | ---             | <b>LR030922</b> |
| <i>Drosanthemum longipes</i><br>(L.Bolus) H.E.K.Hartmann  | <i>Decidua</i>      | Bruyns 6037 (BOL)                    | South Africa:<br>Northern Cape-<br>Calvinia    | ---             | ---             | KF131859        | KF132151        | KF133119        |
| <i>Drosanthemum longipes</i><br>(L.Bolus) H.E.K.Hartmann  | <i>Decidua</i>      | Van Jaarsveld s.n.<br>(HBG)          | South Africa:<br>Western Cape-<br>Riversdale   | LR030988        | LR031147        | LR031099        | LR031051        | LR031207        |
| <i>Drosanthemum luederitzii</i><br>(Engler) Schwantes     | <i>Drosanthemum</i> | Hartmann et al.<br>26095 (HBG)       | Namibia:<br>Lüderitz-Süd                       | <b>LR030546</b> | <b>LR030730</b> | <b>LR030827</b> | <b>LR030635</b> | <b>LR030924</b> |
| <i>Drosanthemum marinum</i> L.<br>Bolus                   | <i>Drosanthemum</i> | Bruckmann &<br>Hansen 32205<br>(HBG) | South Africa:<br>Western Cape-<br>Malmesbury   | <b>LR030547</b> | <b>LR030731</b> | <b>LR030828</b> | <b>LR030636</b> | <b>LR030925</b> |
| <i>Drosanthemum micans</i> (L.)<br>Schwantes              | <i>Speciosa</i>     | Hartmann & Bayer<br>34597 (HBG)      | South Africa:<br>Western Cape-<br>Montagu      | <b>LR030548</b> | <b>LR030732</b> | <b>LR030829</b> | ---             | <b>LR030926</b> |
| <i>Drosanthemum micans</i> (L.)<br>Schwantes              | <i>Speciosa</i>     | LeRoux 83/2 (HBG)                    | South Africa:<br>Western Cape-<br>Worcester    | <b>LR030549</b> | <b>LR030733</b> | <b>LR030830</b> | ---             | <b>LR030927</b> |
| <i>Drosanthemum muirii</i> L.Bolus                        | <i>Drosanthemum</i> | Hartmann 30321<br>(HBG)              | South Africa:<br>Western Cape-<br>Laingsburg   | <b>LR030551</b> | <b>LR030735</b> | <b>LR030831</b> | <b>LR030637</b> | <b>LR030928</b> |
| <i>Drosanthemum muirii</i> L.Bolus                        | <i>Drosanthemum</i> | Bruckmann &<br>Hansen 32209<br>(HBG) | South Africa:<br>Northern Cape-<br>Calvinia    | <b>LR030550</b> | <b>LR030734</b> | ---             | ---             | ---             |
| <i>Drosanthemum nollothense</i><br>Liede & H.E.K.Hartmann | <i>Drosanthemum</i> | Hartmann 31547<br>(HBG)              | South Africa:<br>Northern Cape-<br>Namaqualand | <b>LR030553</b> | <b>LR030737</b> | <b>LR030833</b> | <b>LR030639</b> | <b>LR030930</b> |

| Species                                                               | Section             | Voucher                              | Origin                                                 | ITS      | rps16-trnK | trnQ-rps16 | rpl16    | trnS-G   |
|-----------------------------------------------------------------------|---------------------|--------------------------------------|--------------------------------------------------------|----------|------------|------------|----------|----------|
| <i>Drosanthemum nollothense</i><br>Liede & H.E.K.Hartmann             | <i>Drosanthemum</i> | Hartmann et al.<br>31569 (HBG)       | South Africa:<br>Northern Cape-<br>Namaqualand         | LR030554 | LR030738   | LR030834   | LR030640 | LR030931 |
| <i>Drosanthemum nordenstamii</i><br>L.Bolus                           | <i>Drosanthemum</i> | Hartmann et al.<br>31533 (HBG)       | South Africa:<br>Northern Cape-<br>Namaqualand         | LR030555 | LR030739   | LR030835   | LR030641 | LR030932 |
| <i>Drosanthemum obibense</i> Liede<br>& H.E.K.Hartmann                | <i>Drosanthemum</i> | Hartmann et al.<br>25972 (HBG)       | Namibia:<br>Lüderitz-Süd-<br>Diamanten-<br>Sperrgebiet | LR030545 | LR030729   | LR030826   | LR030634 | LR030923 |
| <i>Drosanthemum obibense</i> Liede<br>& H.E.K.Hartmann                | <i>Drosanthemum</i> | Hartmann et al.<br>25979 (HBG)       | Namibia:<br>Lüderitz-Süd                               | LR030556 | LR030740   | LR030836   | LR030642 | LR030933 |
| <i>Drosanthemum oculatum</i><br>L.Bolus                               | <i>Drosanthemum</i> | Hartmann et al.<br>31680 (HBG)       | South Africa:<br>Northern Cape-<br>Calvinia            | LR030557 | LR030741   | LR030837   | LR030643 | LR030934 |
| <i>Drosanthemum oculatum</i><br>L.Bolus                               | <i>Drosanthemum</i> | Hartmann et al.<br>31710 (HBG)       | South Africa:<br>Northern Cape-<br>Calvinia            | LR030558 | LR030742   | LR030838   | ---      | LR030935 |
| <i>Drosanthemum opacum</i><br>L.Bolus                                 | <i>Drosanthemum</i> | Bruckmann &<br>Hansen 32212<br>(HBG) | South Africa:<br>Western Cape-<br>Morreesburg          | LR030559 | LR030743   | LR030839   | LR030644 | LR030936 |
| <i>Drosanthemum pallens</i> (Haw.)<br>Schwantes ( <i>D. stokoei</i> ) | <i>Ossicula</i>     | Bayer 7454 (HBG)                     | South Africa:<br>Northern Cape:<br>Namaqualand         | HG324021 | HG323970   | HG323996   | LR030645 | LR030937 |
| <i>Drosanthemum papillatum</i><br>L.Bolus                             | <i>Quastea</i>      | Hartmann 34456<br>(HBG) - Worcester  | South Africa:<br>Western Cape-<br>Worcester            | LR030560 | LR030744   | LR030840   | LR030646 | LR030938 |
| <i>Drosanthemum papillatum</i><br>L.Bolus                             | <i>Quastea</i>      | Hartmann & Bayer<br>34607 (HBG)      | South Africa:<br>Western Cape-<br>Swellendam           | HG324020 | HG323968   | HG323994   | LR031052 | LR031208 |
| <i>Drosanthemum papillatum</i><br>L.Bolus                             | <i>Quastea</i>      | Hartmann & Bayer<br>34614 (HBG)      | South Africa:<br>Western Cape-<br>Worcester            | LR030561 | LR030745   | LR030841   | LR030647 | LR030939 |



| Species                                                                                    | Section             | Voucher                         | Origin                                         | ITS      | rps16-trnK | trnQ-rps16 | rpl16    | trnS-G   |
|--------------------------------------------------------------------------------------------|---------------------|---------------------------------|------------------------------------------------|----------|------------|------------|----------|----------|
| <i>Drosanthemum papillatum</i><br>L.Bolus                                                  | <i>Quastea</i>      | Hartmann & Bayer<br>34624 (HBG) | South Africa:<br>Western Cape-<br>Montagu      | LR030562 | LR030746   | LR030842   | LR030648 | LR030940 |
| <i>Drosanthemum papillatum</i><br>L.Bolus                                                  | <i>Quastea</i>      | Hartmann & Bayer<br>34629 (HBG) | South Africa:<br>Western Cape-<br>Caledon      | ---      | LR030747   | LR030843   | ---      | LR030941 |
| <i>Drosanthemum parvifolium</i><br>(Haw.) Schwantes                                        | <i>Drosanthemum</i> | Hartmann 30399<br>(HBG)         | South Africa:<br>Western Cape-<br>Bredasdorp   | LR030563 | LR030748   | LR030844   | LR030649 | LR030942 |
| <i>Drosanthemum praecultum</i><br>(N.E.Br. ) Schwantes ( <i>D.</i><br><i>montaguense</i> ) | <i>Xamera</i>       | Hartmann et al.<br>31824 (HBG)  | South Africa:<br>Western Cape-<br>Uniondale    | HG324019 | HG323967   | HG323993   | LR030650 | LR030943 |
| <i>Drosanthemum prostratum</i><br>L.Bolus <i>aff.</i>                                      | <i>Drosanthemum</i> | Hartmann 34316<br>(HBG)         | South Africa:<br>Northern Cape-<br>Calvinia    | LR030564 | LR030749   | LR030845   | LR030651 | LR030944 |
| <i>Drosanthemum prostratum</i><br>L.Bolus                                                  | <i>Drosanthemum</i> | Hartmann & Bayer<br>34592 (HBG) | South Africa:<br>Western Cape-<br>Ceres        | LR030565 | LR030750   | LR030846   | LR030652 | LR030945 |
| <i>Drosanthemum pulchrum</i><br>L.Bolus                                                    | <i>Speciosa</i>     | Hartmann & Bayer<br>34712 (HBG) | South Africa:<br>Western Cape-<br>Worcester    | LR030566 | LR030751   | LR030847   | ---      | LR030946 |
| <i>Drosanthemum quadratum</i><br>Klak                                                      | <i>Quadrata</i>     | Bruyns 7812 (BOL)               | South Africa:<br>Western Cape-<br>Swellendam   | ---      | ---        | KF131861   | KF132153 | KF133121 |
| <i>Drosanthemum quadratum</i><br>Klak                                                      | <i>Quadrata</i>     | Hartmann & Bayer<br>34503 (HBG) | South Africa:<br>Western Cape-<br>Swellendam   | LR030568 | LR030753   | LR030849   | LR030654 | LR030948 |
| <i>Drosanthemum ramosissimum</i><br>L.Bolus                                                | <i>Drosanthemum</i> | Schmiedel 110492<br>(HBG)       | South Africa:<br>Western Cape-<br>Moedverloren | LR030569 | LR030754   | LR030850   | LR030655 | LR030949 |
| <i>Drosanthemum</i><br><i>schoenlandianum</i> L.Bolus                                      | <i>Drosanthemum</i> | Bruyns 7172 (BOL)               |                                                | AJ438214 | ---        | JN896435   | KF132154 | JN896382 |
| <i>Drosanthemum</i><br><i>schoenlandianum</i> L.Bolus                                      | <i>Drosanthemum</i> | Hartmann et al.<br>25751 (HBG)  | South Africa:<br>Northern Cape-<br>Calvinia    | LR030989 | LR031148   | LR031100   | LR031053 | ---      |

| <b>Species</b>                             | <b>Section</b>     | <b>Voucher</b>                       | <b>Origin</b>                                   | <b>ITS</b>      | <b>rps16-trnK</b> | <b>trnQ-rps16</b> | <b>rpl16</b>    | <b>trnS-G</b>   |
|--------------------------------------------|--------------------|--------------------------------------|-------------------------------------------------|-----------------|-------------------|-------------------|-----------------|-----------------|
| <i>Drosantheum semiglobosum</i><br>L.Bolus | <i>Necopina</i>    | Hartmann & Bayer<br>34593 (HBG)      | South Africa:<br>Western Cape-<br>Worcester     | <b>LR030570</b> | <b>LR030755</b>   | <b>LR030851</b>   | <b>LR030656</b> | <b>LR030950</b> |
| <i>Drosantheum sp.</i>                     | <i>Drosantheum</i> | Bruckmann &<br>Hansen 32218<br>(HBG) | South Africa:<br>Western Cape-<br>Clanwilliam   | <b>LR030571</b> | <b>LR030756</b>   | <b>LR030852</b>   | <b>LR030657</b> | <b>LR030951</b> |
| <i>Drosantheum sp.</i>                     | <i>Drosantheum</i> | Bruckmann &<br>Hansen 32382<br>(HBG) | South Africa:<br>Western Cape-<br>Oudtshoorn    | ---             | <b>LR030757</b>   | <b>LR030853</b>   | <b>LR030658</b> | <b>LR030952</b> |
| <i>Drosantheum sp.</i>                     | <i>Drosantheum</i> | Bruckmann &<br>Hansen 32392<br>(HBG) | South Africa:<br>Western Cape-<br>Mosselbay     | <b>LR030572</b> | <b>LR030758</b>   | <b>LR030854</b>   | <b>LR030659</b> | <b>LR030953</b> |
| <i>Drosantheum sp.</i>                     | <i>Drosantheum</i> | Hartmann & Bayer<br>34472 (HBG)      | South Africa:<br>Western Cape-<br>Robertson     | <b>LR030573</b> | <b>LR030759</b>   | <b>LR030855</b>   | <b>LR030660</b> | <b>LR030954</b> |
| <i>Drosantheum sp.</i>                     | <i>Drosantheum</i> | Hartmann & Bayer<br>34496 (HBG)      | South Africa:<br>Western Cape-<br>Swellendam    | <b>LR030574</b> | <b>LR030760</b>   | <b>LR030856</b>   | <b>LR030661</b> | <b>LR030955</b> |
| <i>Drosantheum sp.</i>                     | <i>Drosantheum</i> | Hartmann 30568<br>(HBG)              | South Africa:<br>Eastern Cape-<br>Graaff-Reinet | <b>LR030575</b> | <b>LR030761</b>   | <b>LR030857</b>   | <b>LR030662</b> | <b>LR030956</b> |
| <i>Drosantheum sp.</i>                     | <i>Drosantheum</i> | Hartmann 33182<br>(HBG)              | South Africa:<br>Northern Cape-<br>De Aar       | <b>LR030576</b> | <b>LR030762</b>   | <b>LR030858</b>   | <b>LR030663</b> | <b>LR030957</b> |
| <i>Drosantheum sp.</i>                     | <i>Drosantheum</i> | Hartmann et al.<br>25365 (HBG)       | South Africa:<br>Western Cape-<br>Prince Albert | <b>LR030577</b> | <b>LR030763</b>   | <b>LR030859</b>   | <b>LR030664</b> | <b>LR030958</b> |
| <i>Drosantheum sp.</i>                     | <i>Drosantheum</i> | Hartmann et al.<br>25376 (HBG)       | South Africa:<br>Western Cape-<br>Ceres         | ---             | <b>LR030764</b>   | <b>LR030860</b>   | <b>LR030665</b> | <b>LR030959</b> |
| <i>Drosantheum sp.</i>                     | <i>Ossicula</i>    | Hartmann & Bayer<br>34699 (HBG)      | South Africa:<br>Western Cape-<br>Swellendam    | <b>LR030578</b> | <b>LR030765</b>   | <b>LR215984</b>   | <b>LR030666</b> | <b>LR030960</b> |

| <b>Species</b>         | <b>Section</b>     | <b>Voucher</b>                 | <b>Origin</b>                             | <b>ITS</b>      | <b>rps16-trnK</b> | <b>trnQ-rps16</b> | <b>rpl16</b>    | <b>trnS-G</b>   |
|------------------------|--------------------|--------------------------------|-------------------------------------------|-----------------|-------------------|-------------------|-----------------|-----------------|
| <i>Drosantheum sp.</i> | <i>Vespertina</i>  | Bruckmann & Hansen 32378 (HBG) | South Africa: Western Cape-Prince Albert  | <b>LR030580</b> | <b>LR030767</b>   | <b>LR030862</b>   | <b>LR030668</b> | <b>LR030962</b> |
| <i>Drosantheum sp.</i> | <i>Vespertina</i>  | Bruckmann & Hansen 32404 (HBG) | South Africa: Western Cape-Riversdale     | <b>LR030581</b> | <b>LR030768</b>   | <b>LR030863</b>   | <b>LR030669</b> | <b>LR030963</b> |
| <i>Drosantheum sp.</i> | <i>Vespertina</i>  | Hartmann 31059 (HBG)           | South Africa: Northern Cape-Philipstown   | <b>LR030582</b> | <b>LR030769</b>   | <b>LR030864</b>   | <b>LR030670</b> | <b>LR030964</b> |
| <i>Drosantheum sp.</i> | <i>Vespertina</i>  | Hartmann 34804 (HBG)           | South Africa: Eastern Cape-Port Elizabeth | <b>LR030583</b> | <b>LR030770</b>   | <b>LR030865</b>   | <b>LR030671</b> | <b>LR030965</b> |
| <i>Drosantheum sp.</i> | <i>Vespertina</i>  | Hartmann et al. 25424 (HBG)    | South Africa: Northern Cape-Namaqualand   | ---             | <b>LR030771</b>   | <b>LR030866</b>   | <b>LR030672</b> | <b>LR030966</b> |
| <i>Drosantheum sp.</i> | <i>Vespertina</i>  | Hartmann et al. 26170a (HBG)   | South Africa: Western Cape-Vredendal      | <b>LR030584</b> | <b>LR030772</b>   | <b>LR030867</b>   | <b>LR030673</b> | <b>LR030967</b> |
| <i>Drosantheum sp.</i> | <i>Vespertina</i>  | Hartmann et al. 31925 (HBG)    | South Africa: Eastern Cape-Cradock        | ---             | <b>LR030773</b>   | <b>LR030868</b>   | <b>LR030674</b> | <b>LR030968</b> |
| <i>Drosantheum sp.</i> | <i>Vespertina</i>  | Hartmann et al. 33490 (HBG)    | South Africa: Eastern Cape-Hofmeyr        | <b>LR030585</b> | <b>LR030774</b>   | <b>LR030869</b>   | <b>LR030675</b> | <b>LR030969</b> |
| <i>Drosantheum sp.</i> | <i>Xamera</i>      | Hartmann & Milton 34586 (HBG)  | South Africa: Western Cape-Prince Albert  | <b>LR030586</b> | <b>LR030775</b>   | <b>LR030870</b>   | <b>LR030676</b> | <b>LR030970</b> |
| <i>Drosantheum sp.</i> | <i>Xamera</i>      | Hartmann 34424 (HBG)           | South Africa: Northern Cape-Victoria West | <b>LR030587</b> | <b>LR030776</b>   | <b>LR030871</b>   | <b>LR030677</b> | <b>LR030971</b> |
| <i>Drosantheum sp.</i> | <i>Drosantheum</i> | Mucina 161005-14 (NBG)         | South Africa: Western Cape-Piketberg      | <b>LR030588</b> | <b>LR030777</b>   | <b>LR030872</b>   | <b>LR030678</b> | <b>LR030972</b> |

| Species                                            | Section             | Voucher                              | Origin                                         | ITS             | rps16-trnK      | trnQ-rps16      | rpl16           | trnS-G          |
|----------------------------------------------------|---------------------|--------------------------------------|------------------------------------------------|-----------------|-----------------|-----------------|-----------------|-----------------|
| <i>Drosanthemum speciosum</i><br>(Haw.) Schwantes  | <i>Speciosa</i>     | Bruyns 9006 (BOL)                    | South Africa:<br>Western Cape-<br>Worcester    | ---             | ---             | KF131862        | KF132155        | KF133122        |
| <i>Drosanthemum speciosum</i><br>(Haw.) Schwantes  | <i>Speciosa</i>     | Hartmann & Bayer<br>34619 (HBG)      | South Africa:<br>Western Cape-<br>Worcester    | HE585039        | HG323969        | HG323995        | ---             | ---             |
| <i>Drosanthemum striatum</i><br>Schwantes          | <i>Ossicula</i>     | Hartmann 29013<br>(HBG)              | South Africa:<br>Western Cape-<br>Worcester    | <b>LR030589</b> | <b>LR030778</b> | ---             | <b>LR030679</b> | <b>LR030973</b> |
| <i>Drosanthemum striatum</i><br>Schwantes          | <i>Ossicula</i>     | Hartmann & Bayer<br>34698 (HBG)      | South Africa:<br>Western Cape-<br>Swellendam   | <b>LR030567</b> | <b>LR030752</b> | <b>LR030848</b> | <b>LR030653</b> | <b>LR030947</b> |
| <i>Drosanthemum striatum</i><br>Schwantes          | <i>Ossicula</i>     | Hartmann & Bayer<br>34720 (HBG)      | South Africa:<br>Western Cape-<br>Worcester    | <b>LR030590</b> | <b>LR030779</b> | <b>LR030873</b> | <b>LR030680</b> | <b>LR030974</b> |
| <i>Drosanthemum subclausum</i><br>L.Bolus          | <i>Drosanthemum</i> | Hartmann et al.<br>25737 (HBG)       | South Africa:<br>Western Cape-<br>Vanrhynsdorp | HG324022        | HG323971        | HG323997        | <b>LR030681</b> | <b>LR030975</b> |
| <i>Drosanthemum subplanum</i><br>L.Bolus           | <i>Drosanthemum</i> | Bruckmann &<br>Hansen 32259<br>(HBG) | South Africa:<br>Northern Cape-<br>Calvinia    | <b>LR030591</b> | <b>LR030780</b> | <b>LR030874</b> | <b>LR030682</b> | <b>LR030976</b> |
| <i>Drosanthemum tetramerum</i><br>H.E.K.Hartmann   | <i>Quadrata</i>     | Hartmann & Bayer<br>34488 (HBG)      | South Africa:<br>Western Cape-<br>Caledon      | LR030990        | LR031149        | LR031101        | ---             | ---             |
| <i>Drosanthemum thudichumii</i><br>L.Bolus         | <i>Necopina</i>     | Hartmann & Bayer<br>34714 (HBG)      | South Africa:<br>Western Cape-<br>Worcester    | HG324023        | HG323972        | HG323998        | LR031054        | LR031209        |
| <i>Drosanthemum tuberculiferum</i><br>L. Bolus     | <i>Drosanthemum</i> | Bruckmann &<br>Hansen 32398<br>(HBG) | South Africa:<br>Western Cape-<br>Riversdale   | ---             | <b>LR030781</b> | <b>LR030875</b> | <b>LR030683</b> | <b>LR030977</b> |
| <i>Drosanthemum uniondalense</i><br>H.E.K.Hartmann | <i>Speciosa</i>     | Hartmann 34813<br>(HBG)              | South Africa:<br>Western Cape-<br>Uniondale    | <b>LR030592</b> | <b>LR030782</b> | <b>LR030876</b> | <b>LR030684</b> | <b>LR030978</b> |

| Species                                                     | Section                            | Voucher                         | Origin                                      | ITS      | rps16-trnK | trnQ-rps16 | rpl16    | trnS-G   |
|-------------------------------------------------------------|------------------------------------|---------------------------------|---------------------------------------------|----------|------------|------------|----------|----------|
| <i>Drosanthemum zygophylloides</i> (L.Bolus) L.Bolus        |                                    | Klak 830 (BOL)                  | South Africa:<br>Western Cape-<br>Piketberg | ---      | ---        | KF131863   | KF132156 | KF133123 |
| <i>Drosanthemum zygophylloides</i> (L.Bolus) L.Bolus        |                                    | Mucina 130216-4                 | South Africa:<br>Western Cape-<br>Piketberg | LR030991 | LR031150   | LR031102   | LR031055 | LR031210 |
| <b>Outgroup</b>                                             | <b>Clade in Klak et al. (2013)</b> |                                 |                                             |          |            |            |          |          |
| <i>Antegibbaeum fissoides</i> (Haw.) Schwantes ex H.Wulff   | L3                                 | Klak 308 (BOL)                  | South Africa:<br>Western Cape               | AJ438227 | --         | KF131867   | KF132159 | KF133127 |
| <i>Antimima ventricosa</i> (L.Bolus) H.E.K.Hartmann         | L2                                 | Klak 475 (BOL)                  | South Africa:<br>Northern Cape              | AJ438225 | --         | JN896434   | KF132163 | JN896381 |
| <i>Braunsia geminata</i> (Haw.) L.Bolus                     | L2                                 | Klak 205 (BOL)                  | South Africa                                | AJ438228 | --         | KF131875   | KF132168 | KF133135 |
| <i>Carpobrotus muirii</i> (L.Bolus) L.Bolus                 | L1                                 | Klak 706 (BOL)                  | South Africa:<br>Western Cape               | AJ438230 | --         | KF131877   | KF132170 | KF133137 |
| <i>Cephalophyllum inaequale</i> L.Bolus                     | L1                                 | Hartmann 7883 (HBG)             | South Africa:<br>Western Cape               | HG324002 | HG323950   | HG323976   | LR031056 | LR031211 |
| <i>Chasmatophyllum musculinum</i> (Haw.) Dinter & Schwantes | L3                                 | Bolduan s.n.                    | ex hort. ZSS (994202/0)                     | HG324003 | HG324003   | HG323977   | LR031057 | LR031212 |
| <i>Cheiridopsis pearsonii</i> N.E.Br.                       | I                                  | Bruyns 9504 (BOL)               | South Africa                                | --       | --         | KF131885   | KF132178 | KF133145 |
| <i>Cheiridopsis rostrata</i> (L.) N.E.Br.                   | I                                  | Powell 88 (NBG)                 | South Africa:<br>Western Cape               | --       | --         | KY635278   | KY635037 | KY635358 |
| <i>Conophytum calculus</i> (A.Berger) N.E.Br.               | I                                  | Klak 1641 (BOL)                 | South Africa:<br>Western Cape               | --       | --         | KF131887   | KF132180 | KF133147 |
|                                                             |                                    | Ritz s.n.                       | ex hort.                                    | FN386499 | --         | --         | --       | --       |
| <i>Corpuscularia lehmannii</i> (Eckl. & Zeyh.) Schwantes    | F                                  | Klak 353 (BOL)                  | South Africa                                | --       | --         | KF131889   | KF132182 | KF133149 |
| <i>Corpuscularia lehmannii</i> (Eckl. & Zeyh.) Schwantes    |                                    | Hartmann & Kremling 33693 (HBG) | South Africa:<br>Eastern Cape               | AJ582942 | --         | --         | --       | --       |
| <i>Deilanthe peersii</i> (L.Bolus) N.E.Br.                  | L4                                 | Klak 1694 (BOL)                 | South Africa:<br>Western Cape               | --       | --         | KF131891   | KF132184 | KF133151 |
| <i>Deilanthe peersii</i> (L.Bolus) N.E.Br.                  |                                    | Hartmann & Dehn 15486 (HBG)     | South Africa:<br>Eastern Cape               | LR030992 | LR031151   | --         | --       | --       |

| Species                                                             | Section | Voucher                                | Origin                         | ITS      | rps16-trnK | trnQ-rps16 | rpl16           | trnS-G          |
|---------------------------------------------------------------------|---------|----------------------------------------|--------------------------------|----------|------------|------------|-----------------|-----------------|
| <i>Delosperma echinatum</i> (Lam.)<br>Schwantes                     | F       | Hartmann &<br>Kremling 33682<br>(HBG)  | South Africa:<br>Eastern Cape  | HG324005 | HG323953   | HG323979   | <b>LR031067</b> | <b>LR031225</b> |
| <i>Delosperma esterhuyseniae</i><br>L.Bolus                         | F       | Bruyns 7141 (BOL)                      | South Africa                   | AJ438213 | --         | JN896438   | KF132187        | JN896385        |
| <i>Dicrocaulon brevifolium</i> N.E.Br.                              | B       | Hartmann 1480<br>(HBG)                 | South Africa:<br>Western Cape  | LR030993 | LR031152   | LR031103   | LR031058        | LR031213        |
| <i>Dicrocaulon microstigma</i><br>(L.Bolus) Ihlenf.                 | B       | Ihlenfeldt &<br>Hartmann 4529<br>(HBG) | South Africa:<br>Western Cape  | HG324007 | HG323955   | HG323981   | LR031059        | LR031214        |
| <i>Disphyma dunsdonii</i> L.Bolus                                   | C       | Klak 808 (BOL)                         | South Africa                   | --       | --         | KF131902   | KF132194        | KF133162        |
| <i>Disphyma dunsdonii</i> L.Bolus                                   |         | Hartmann & Bayer<br>34630 (HBG)        | South Africa:<br>Western Cape  | LR030994 | LR031153   | --         | --              | --              |
| <i>Drosanthemopsis diversifolia</i><br>(L.Bolus) Klak               | H       | Hartmann et al.<br>26169 (HBG)         | South Africa:<br>Western Cape  | HG324013 | HG323961   | HG323987   | LR031060        | LR031215        |
| <i>Drosanthemopsis diversifolia</i><br>(L.Bolus) Klak               | H       | Klak 1743 (BOL)                        | South Africa                   | --       | --         | KF131856   | KF132149        | KF133116        |
| <i>Drosanthemopsis vaginata</i><br>(L.Bolus) Rauschert              | H       | Wisura 882 (BOL)                       | South Africa                   | --       | --         | KF131923   | KF132215        | KF133184        |
| " <i>Drosanthemum</i> "<br><i>pulverulentum</i> (Haw.)<br>Schwantes | L1      | Klak 1847 (BOL)                        | South Africa:<br>Western Cape  | --       | --         | KF131860   | KF132152        | KF133120        |
| <i>Erepsia inlaudens</i> (Haw.)<br>Schwantes                        | L1      | Bruyns 6847 (BOL)                      | South Africa:<br>Western Cape  | AJ438234 | --         | KF131907   | KF132200        | KF133168        |
| <i>Enarganthe octonaria</i> (L.Bolus)<br>N.E.Br.                    | I       | Klak 491 (BOL)                         | South Africa:<br>Northern Cape | --       | --         | JN896433   | KF132198        | JN896380        |
| <i>Enarganthe octonaria</i> (L.Bolus)<br>N.E.Br.                    |         | Hartmann 7505<br>(HBG)                 | South Africa:<br>Northern Cape | LR030995 | LR031154   | --         | --              | --              |
| <i>Esterhuysenia mucronata</i><br>(L.Bolus) Klak                    | L2      | Klak 709 (BOL)                         | South Africa:<br>Western Cape  | AJ438255 |            | KF131908   | KF132201        | KF133169        |
| <i>Gibbaeum hortenseae</i> (N.E.Br.)<br>Thiede & Klak               | E       | Klak 1979 (BOL)                        | South Africa                   | --       | --         | KF131913   | KF132205        | KF133174        |
| <i>Gibbaeum pachypodium</i><br>(Kensit) L.Bolus                     | E       | Klak 380 (BOL)                         | South Africa                   | --       | --         | KF131914   | KF132206        | KF133175        |
| <i>Glottiphyllum cruciatum</i><br>(Haw.) N.E.Br.                    | D       | Bruyns 8207                            | South Africa                   | --       | --         | KF131915   | KF132207        | KF133176        |

| Species                                                                                     | Section | Voucher                                | Origin                         | ITS      | rps16-trnK | trnQ-rps16 | rpl16    | trnS-G   |
|---------------------------------------------------------------------------------------------|---------|----------------------------------------|--------------------------------|----------|------------|------------|----------|----------|
| <i>Glottiphyllum cruciatum</i><br>(Haw.) N.E.Br.                                            |         | Hartmann 8809<br>(HBG)                 | South Africa:<br>Western Cape  | LR030996 | LR031155   | --         | --       | --       |
| <i>Hartmanthus pergamentaceus</i><br>(L.Bolus) S.A.Hammer                                   | K       | Klak 243 (BOL)                         | Namibia                        | --       | --         | KF131919   | KF132211 | KF133180 |
| <i>Hartmanthus pergamentaceus</i><br>(L.Bolus) S.A.Hammer                                   | K       | Klak 1992 (BOL)                        |                                | --       | --         | KF131920   | KF132212 | KF133181 |
| <i>Ihlenfeldtia excavata</i> (L.Bolus)<br>H.E.K.Hartmann                                    | I       | Wisura 1926 (BOL)                      | South Africa                   | --       | --         | KF131921   | KF132214 | KF133182 |
| <i>Ihlenfeldtia excavata</i> (L.Bolus)<br>H.E.K.Hartmann                                    |         | Hartmann et al.<br>20587 (HBG)         | South Africa:<br>Northern Cape | LR030997 | LR031156   | --         | --       | --       |
| <i>Jacobsenia hallii</i> L.Bolus                                                            | J       | Ihlenfeldt &<br>Hartmann 4463<br>(HBG) | South Africa:<br>Northern Cape | HG324024 | HG323973   | HG323999   | LR031061 | LR031216 |
| <i>Jacobsenia kolbei</i> (L.Bolus)<br>L.Bolus & Schwantes                                   | J       | Klak 1819 (BOL)                        | South Africa                   | --       | --         | KF131922   | --       | KF133183 |
| <i>Jacobsenia kolbei</i> (L.Bolus)<br>L.Bolus & Schwantes                                   |         | Ihlenfeldt &<br>Hartmann 5060<br>(HBG) | South Africa:<br>Western Cape  | AJ582951 | --         | --         | --       | --       |
| <i>Lampranthus bicolor</i> (L.)<br>N.E.Br.                                                  | L1      | Klak 543 (BOL)                         | South Africa:<br>Western Cape  | AJ438250 | --         | JN896437   | KF132221 | JN896384 |
| <i>Lithops julii</i> (Dinter &<br>Schwantes) N.E.Br. ssp. <i>fulleri</i><br>(N.E.Br.) Fearn | L1      | Klak 701 (BOL)                         | South Africa:<br>Northern Cape | AJ438218 | --         | KF131934   | KF132227 | KF133195 |
| <i>Malephora lutea</i> (Haw)<br>Schwantes                                                   | D       | Klak 664 (BOL)                         | South Africa:<br>Western Cape  | --       | --         | KF131936   | KF132229 | KF133197 |
| <i>Meyerophytum globosum</i><br>(L.Bolus) Ihlenf.                                           | G       | Hammer sub HBG<br>6314 (BOL)           | South Africa                   | --       | --         | KF131939   | KF132087 | KF133200 |
| <i>Meyerophytum meyeri</i><br>(Schwantes) Schwantes                                         | G       | Rawe s.n. (BOL)                        | South Africa                   | --       | --         | KF131940   | KF132233 | KF133201 |
| <i>Meyerophytum meyeri</i><br>(Schwantes) Schwantes                                         |         | Ihlenfeldt &<br>Hartmann 5046<br>(HBG) | South Africa:<br>Northern Cape | LR030998 | LR031157   | --         | --       | --       |
| <i>Mitrophyllum clivorum</i><br>(N.E.Br.) Schwantes                                         | G       | Klak 1987 (BOL)                        | South Africa                   | --       | --         | KF131941   | KF132234 | KF133202 |

| Species                                                     | Section | Voucher                                | Origin                                  | ITS      | rps16-trnK | trnQ-rps16 | rpl16    | trnS-G   |
|-------------------------------------------------------------|---------|----------------------------------------|-----------------------------------------|----------|------------|------------|----------|----------|
| <i>Mitrophyllum clivorum</i><br>(N.E.Br.) Schwantes         |         | Ihlenfeldt &<br>Hartmann 4681<br>(HBG) | South Africa:<br>Northern Cape          | LR030999 | LR031158   | --         | --       | --       |
| <i>Monilaria moniliformis</i><br>(Thunb.) Ihlenf. & Jürgens | B       | Klak 787 (BOL)                         | South Africa:<br>Western Cape           | --       | --         | KF131942   | KF132235 | KF133203 |
| <i>Monilaria moniliformis</i><br>(Thunb.) Ihlenf. & Jürgens |         | Ihlenfeldt &<br>Hartmann 4213<br>(HBG) | South Africa:<br>Western Cape           | LR031000 | LR031159   | --         | --       | --       |
| <i>Nananthus aloides</i> (Haw.)<br>Schwantes                | L4      | Klak 1797 (BOL)                        | South Africa:<br>North West<br>Province | --       | --         | KF131946   | KF132238 | KF133207 |
| <i>Nananthus aloides</i> (Haw.)<br>Schwantes                |         | Hartmann 32029<br>(HBG)                | South Africa:<br>Northern Cape          | LR031001 | LR031160   | --         | --       | --       |
| <i>Odontophorus marlothii</i><br>N.E.Br.                    | I       | Hartmann 7582<br>(HBG)                 | South Africa:<br>Northern Cape          | HG324025 | HG323974   | HG324000   | LR031062 | LR031217 |
| <i>Odontophorus marlothii</i><br>N.E.Br.                    | I       | Klak 862 (BOL)                         | South Africa:<br>Northern Cape          | --       | --         | KF131951   | KF132243 | KF133212 |
| <i>Oscularia deltoides</i> (L.)<br>Schwantes                | L1      | Klak 215 (BOL)                         | South Africa                            | AJ438215 | --         | KF131955   | KF132246 | KF133216 |
| <i>Pleiospilos simulans</i> (Marloth)<br>N.E.Br.            | L4      | Bruyns 4988 (BOL)                      | South Africa:<br>Eastern Cape           | --       | --         | KF131959   | KF132250 | KF133220 |
| <i>Polymita steenbokensis</i><br>H.E.K.Hartmann             | I       | Bruyns 8267 (BOL)                      | South Africa:<br>Northern Cape          | --       | --         | KF131960   | KF132251 | KF133221 |
| <i>Polymita steenbokensis</i><br>H.E.K.Hartmann             |         | Hartmann & Bayer<br>78032 (HBG)        | South Africa:<br>Northern Cape          | LR031002 | LR031161   | --         | --       | --       |
| <i>Prepodesma orpenii</i> (N.E.Br.)<br>N.E.Br.              | L4      | Klak 1800 (BOL)                        | South Africa:<br>North West<br>Province | --       | --         | KF131961   | --       | KF133222 |
| <i>Prepodesma orpenii</i> (N.E.Br.)<br>N.E.Br.              |         | Hartmann & Dehn<br>19666 (HBG)         | South Africa:<br>Northern Cape          | LR031003 | LR031162   | --         | --       | --       |
| <i>Roosia grahambeckii</i> (Van<br>Jaarsv.) Van Jaarsv.     | --      | VanJaarsveld s.n.<br>(NBG)             | South Africa:<br>Western Cape           | LR031004 | LR031163   | LR031104   | LR031063 | LR031218 |
| <i>Ruschia maxima</i> (Haw.) L.Bolus                        | L1      | Klak 704 (BOL)                         | South Africa                            | AJ438222 | --         | KF131969   | KF132258 | KF133231 |
| <i>Schlechteranthus hallii</i> L.Bolus                      | I       | Klak 259 (BOL)                         | South Africa:<br>Northern Cape          | --       | --         | KF131980   | KF132268 | KF133242 |



| Species                                                                                            | Section | Voucher                            | Origin                                 | ITS      | rps16-trnK | trnQ-rps16 | rpl16    | trnS-G   |
|----------------------------------------------------------------------------------------------------|---------|------------------------------------|----------------------------------------|----------|------------|------------|----------|----------|
| <i>Schlechteranthus hallii</i> L.Bolus                                                             |         | Hartmann 8276 (HBG)                | South Africa:<br>Northern Cape         | LR031005 | --         | --         | --       | --       |
| <i>Scopelogenia bruynsii</i> Klak                                                                  | L1      | Klak 462 (BOL)                     | South Africa:<br>Western Cape          | AJ438258 | --         | KF131982   | KF132269 | KF133244 |
| <i>Smicrostigma viride</i> (Haw.)<br>N.E.Br.                                                       | L2      | Klak 180 (BOL)                     | South Africa:<br>Western Cape          | AJ438259 | --         | JN896432   | KF132270 | JN896379 |
| <i>Vlokia ater</i> S.A.Hammer                                                                      | L3      | Hammer & Vlok<br>1181 (BOL)        | South Africa:<br>Western Cape          | AJ438260 | --         | KF131992   | KF132279 | KF133254 |
| <i>Wooleya farinosa</i> (L.Bolus)<br>L.Bolus                                                       | L1      | Hartmann 7213<br>(HBG)             | South Africa:<br>Northern Cape         | HG324026 | HG323975   | HG324001   | LR031064 | LR031219 |
| <i>Zeuktophyllum suppositum</i><br>(L.Bolus) N.E.Br.                                               | L2      | Klak 375 (BOL)                     | South Africa:<br>Western Cape          | AJ438262 | --         | KF131994   | KF132281 | KF133256 |
| <b>Dorotheanthaeae</b>                                                                             |         |                                    |                                        |          |            |            |          |          |
| <i>Cleretum bellidiforme</i><br>(Burm.f.) G.D.Rowley                                               |         | Klak 627 (BOL)/<br>Klak 1534 (BOL) | South Africa:<br>South Western<br>Cape | KF132145 | JN896383   | JN896436   | --       | JN896503 |
| <i>Cleretum papulosum</i> (L.f.)<br>L.Bolus                                                        |         | Klak 1487 (BOL)                    | South Africa:<br>Northern Cape         | KF132146 | JN896408   | JN896461   | --       | JN896507 |
| <i>Cleretum rourkei</i> L. Bolus                                                                   |         | Klak 1524 (BOL)                    | South Africa:<br>Northern Cape         | --       | JN896500   | JN896454   | --       | JN896500 |
| <b>Apatesieae</b>                                                                                  |         |                                    |                                        |          |            |            |          |          |
| <i>Conicosia pugioniformis</i> (L.)<br>N.E.Br. ssp. <i>muirii</i> (N.E.Br.)<br>Ihlenf. & Gerbaulet |         | Klak 1570                          | South Africa:<br>South Western<br>Cape | KF132144 | JN896409   | JN896462   | --       | JN896508 |
| <i>Conicosia pugioniformis</i> (L.)<br>N.E.Br.                                                     |         | Juergens sn.                       | South Africa                           | HG324004 | HG323952   | HG323978   | --       | --       |
